# Supplementary material for: UV irradiation synthesis of an Au–graphene nanocomposite with enhanced electrochemical sensing properties
Source: Royal Society of Chemistry journal article supplement (doi:10.1039/c3ta11155e), 2013-01-01
Supplement: c3ta11155e.pdf [file c3ta11155e.pdf]

## Supporting Information

### UV irradiation synthesis of Au-graphene nanocomposite with enhanced electrochemical sensing properties

Ping Wang,<sup>a,b‡</sup> Zhong-Gang Liu,<sup>a,b‡</sup> Xing Chen,<sup>b</sup> Fan-Li Meng,<sup>b</sup> Jin-Huai Liu<sup>b</sup> and Xing-Jiu Huang<sup>\*a,b</sup>

<sup>a</sup> *Department of Chemistry, University of Science and Technology of China, Hefei 230026, PR China*

<sup>b</sup> *Laboratory of Nanomaterials and Environmental Detection, Hefei Institute of Physical Sciences, Chinese Academy of Sciences, Hefei 230031, PR China*

\*Address correspondence to X.-J. Huang

E-mail: [xingjiuhuang@iim.ac.cn](mailto:xingjiuhuang@iim.ac.cn) (X.J.H)

Tel.: +86-551-65591167; fax: +86-551-65592420

‡ These authors contributed equally to this work.

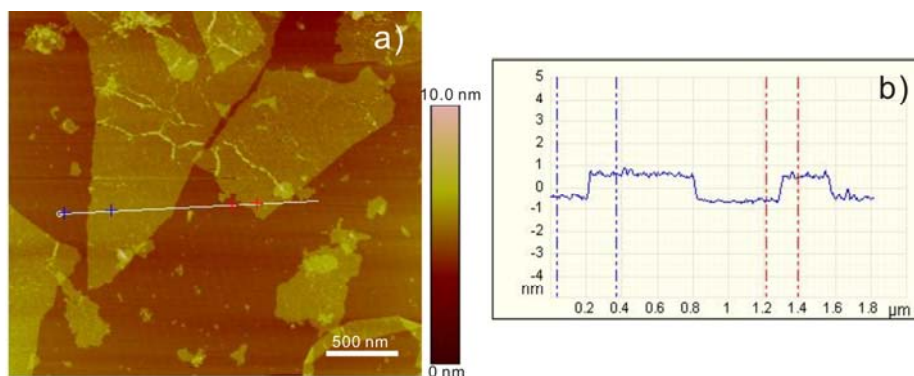

**Fig. S1.** (a) AFM image of exfoliated graphene oxide sheets. (b) the height profiles of AFM image.

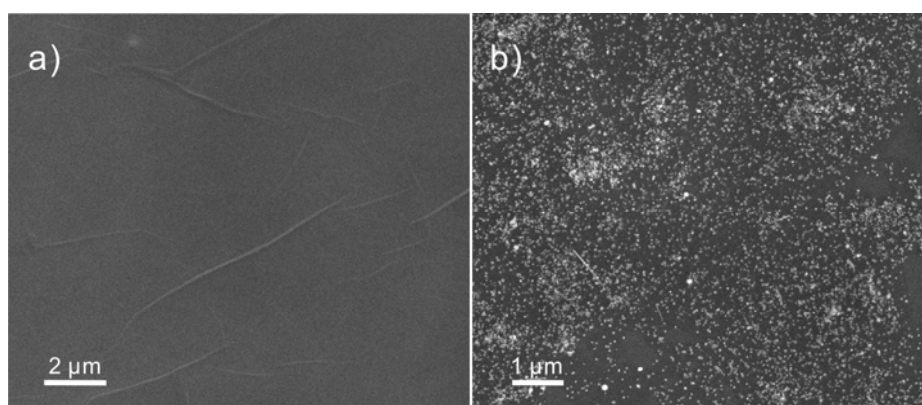

**Fig. S2** SEM images of (a) graphene oxide sheets and (b) Au-reduced graphene oxide nanocomposite.

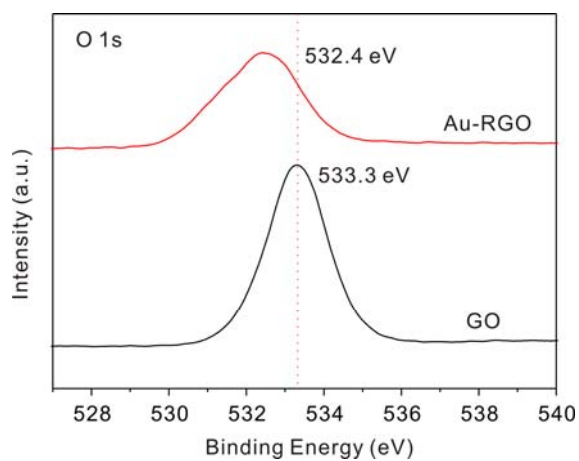

**Fig. S3** O 1s XPS spectra of GO and Au-RGO nanocomposite.

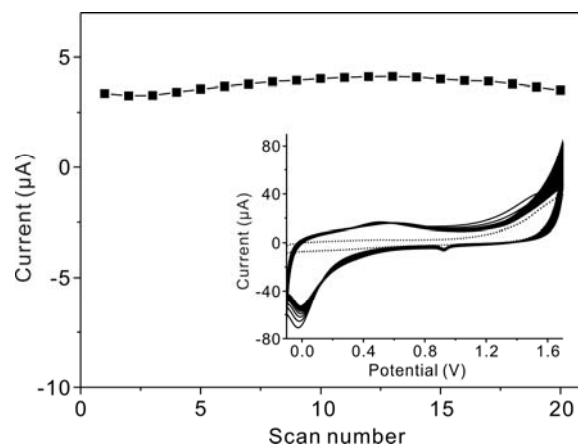

**Fig. S4** Measurements stability of Au-RGO modified GCE in 0.5 M H<sub>2</sub>SO<sub>4</sub> at a scan rate of 100 mV s<sup>-1</sup>. Data were collected from cyclic voltammograms responses at about 0.92 V shown in the inset. The dotted line refers to the response of bare GCE.
